# Supplementary material
Source: PubMed Central journal article supplement (PMC6640524)

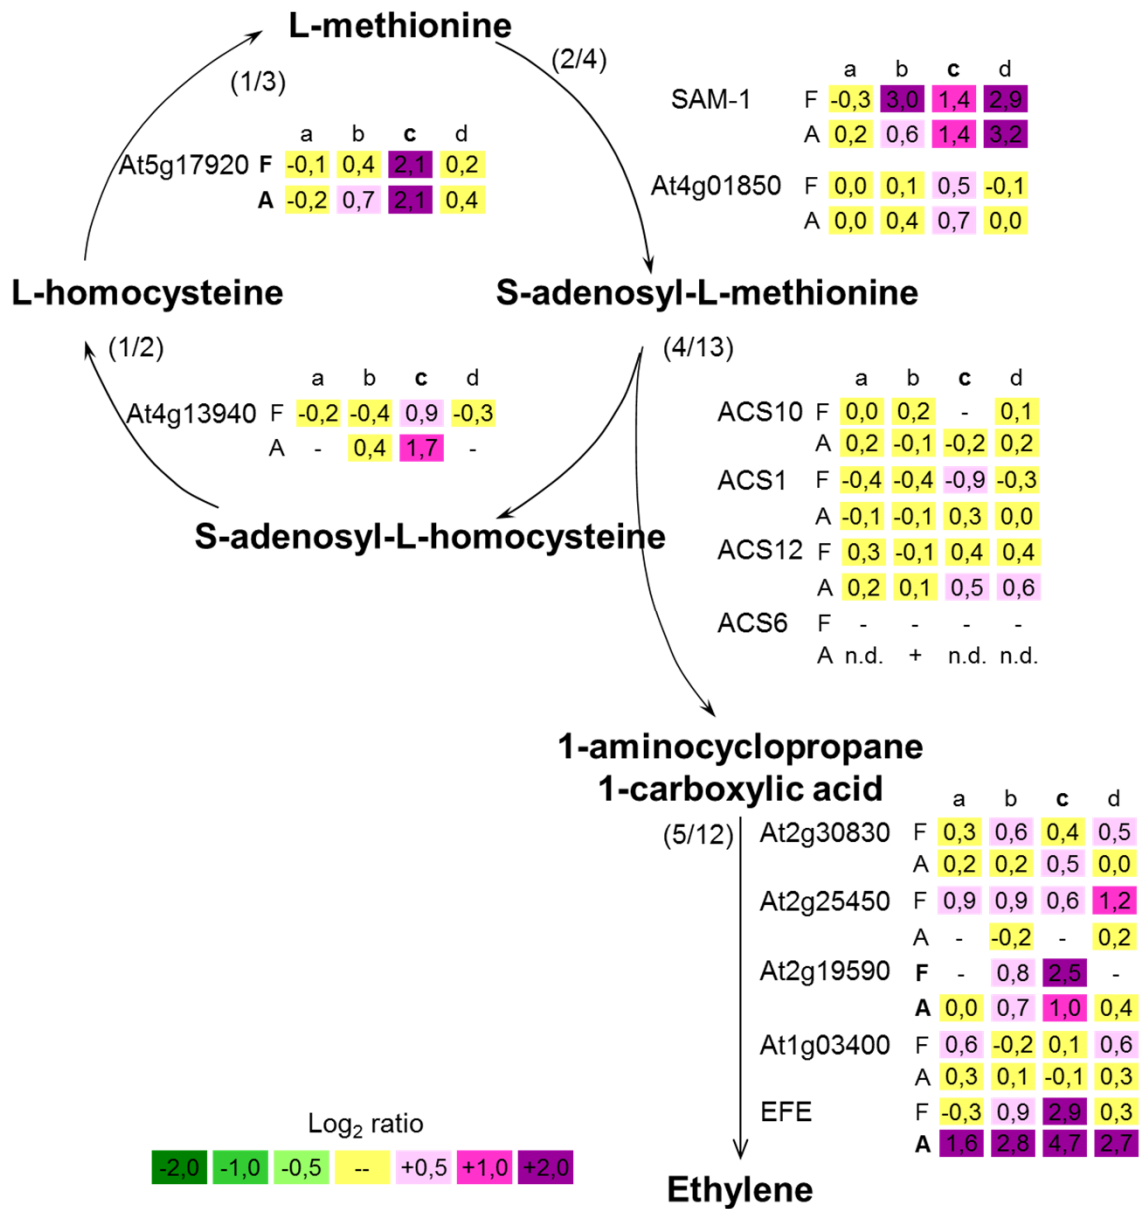

Fig. S5. (Ballester et al. 2011)

Supplement: MPP-12-879-s002.pdf [file MPP-12-879-s002.pdf]

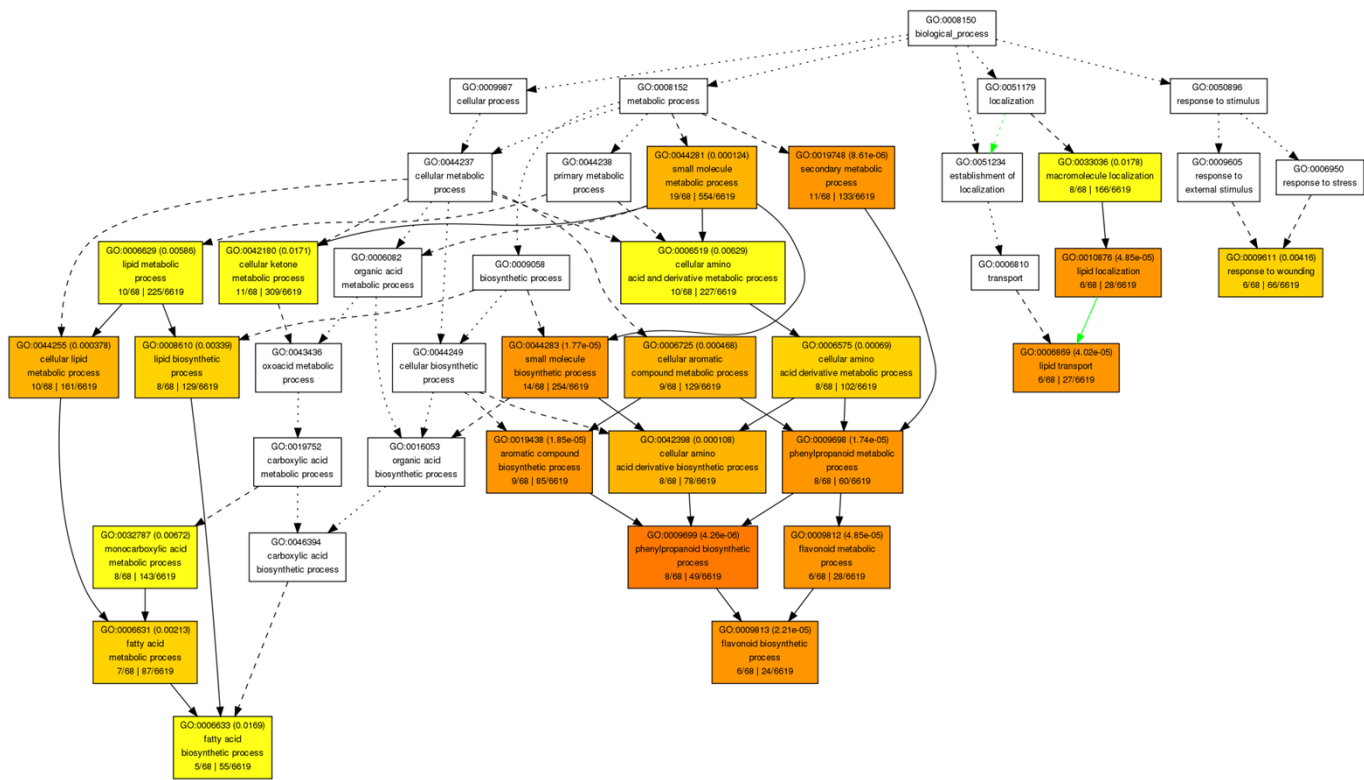

Fig. S1. (Ballester *et al.* 2011)

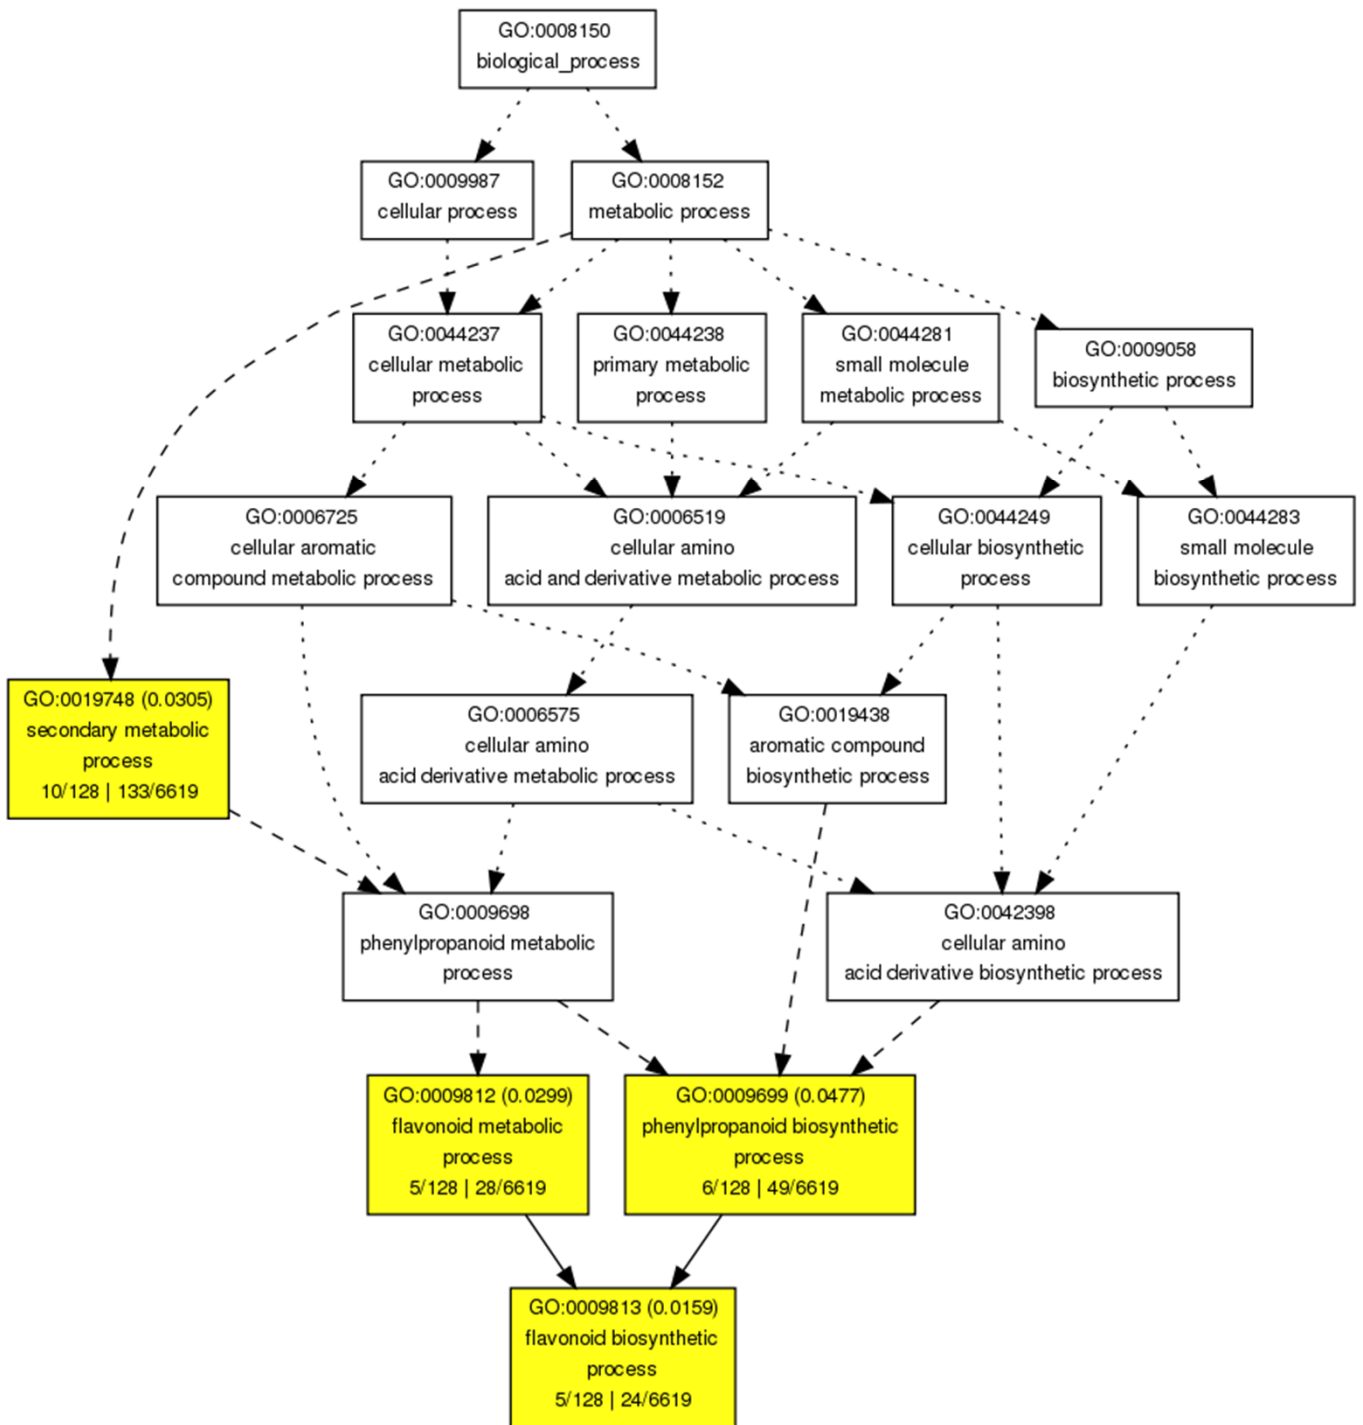

**Fig. S2.** (Ballester *et al.* 2011)



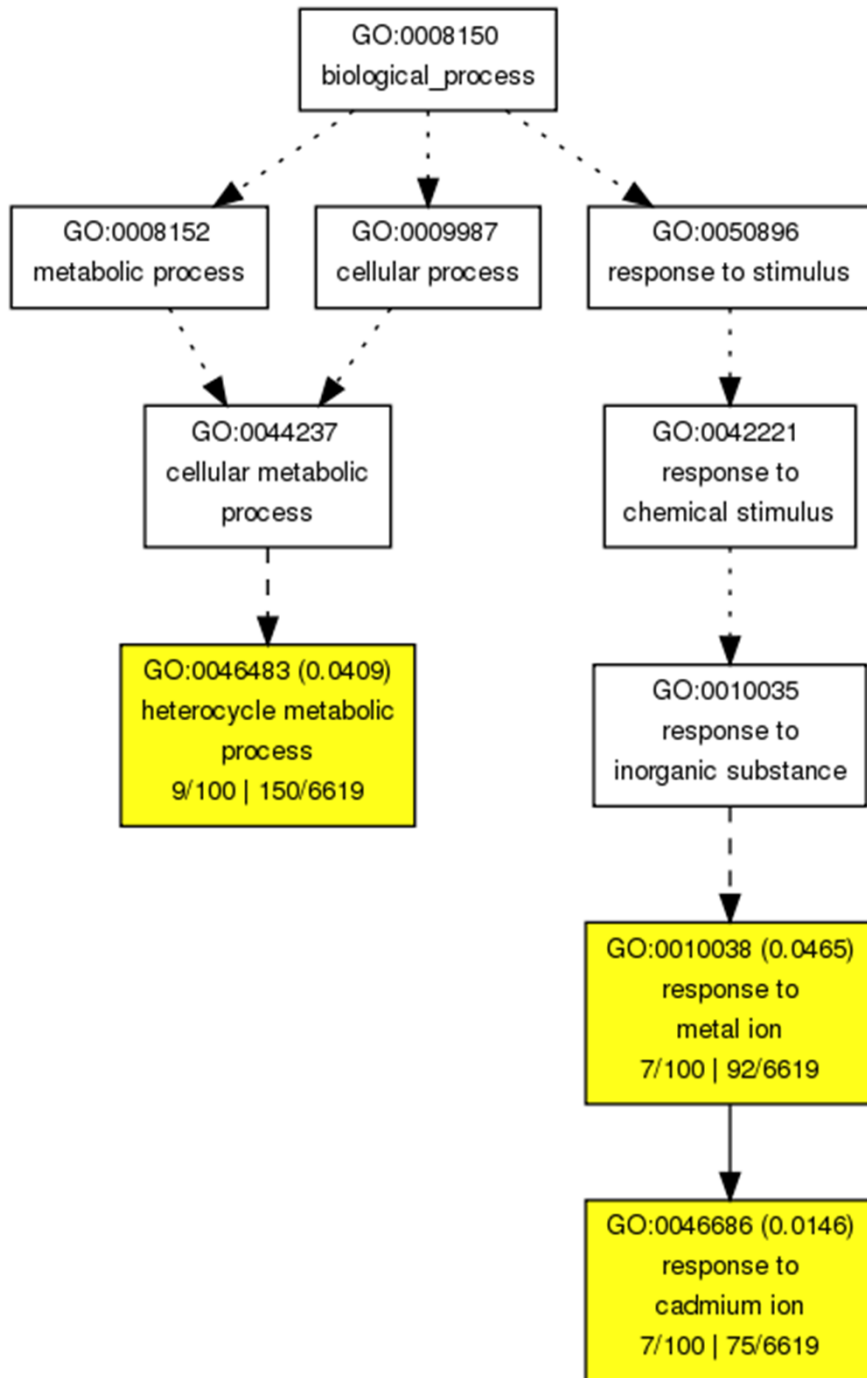

**Fig. S4.** (Ballester *et al.* 2011)

Supplement: MPP-12-879-s003.pdf [file MPP-12-879-s003.pdf]
